# Supplementary material for: Nuclear genes involved in mitochondria-to-nucleus communication in breast cancer cells.
Source: Springer Nature journal article supplement (doi:10.1186/1476-4598-1-6), 2002-01-01
Supplement: 12943_2002_6_MOESM5_ESM.pdf [file 12943_2002_6_MOESM5_ESM.pdf]

TFIIH

PLC

p19

AML-1

G3PDH

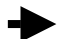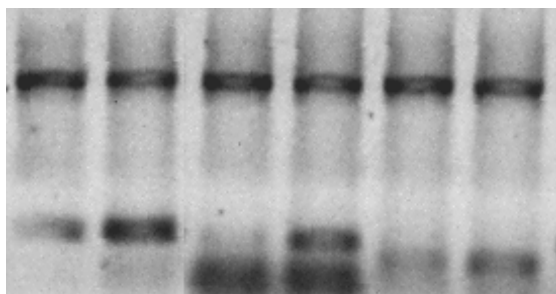Rho<sup>+</sup>Rho<sup>0</sup>Rho<sup>+</sup>Rho<sup>0</sup>Rho<sup>+</sup>Rho<sup>0</sup>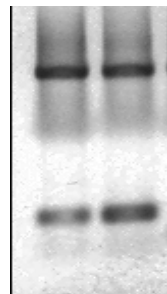Rho<sup>+</sup>Rho<sup>0</sup>

PLA2

Agouti

G3PDH

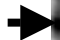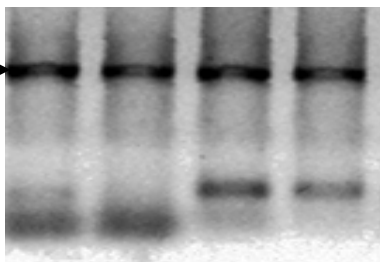Rho<sup>+</sup>Rho<sup>0</sup>Rho<sup>+</sup>Rho<sup>0</sup>
