# Supplementary figures and images for: Nuclear genes involved in mitochondria-to-nucleus communication in breast cancer cells.
Source: Springer Nature journal article supplement (doi:10.1186/1476-4598-1-6), 2002-01-01

**A****B**

kb

1

2

1

2

23,130

9,416

6,557

4,361

2,322

2,027

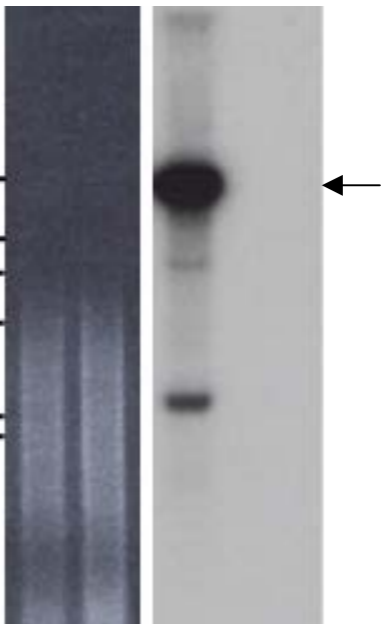

Supplement: 12943_2002_6_MOESM1_ESM.pdf [file 12943_2002_6_MOESM1_ESM.pdf]

A

B

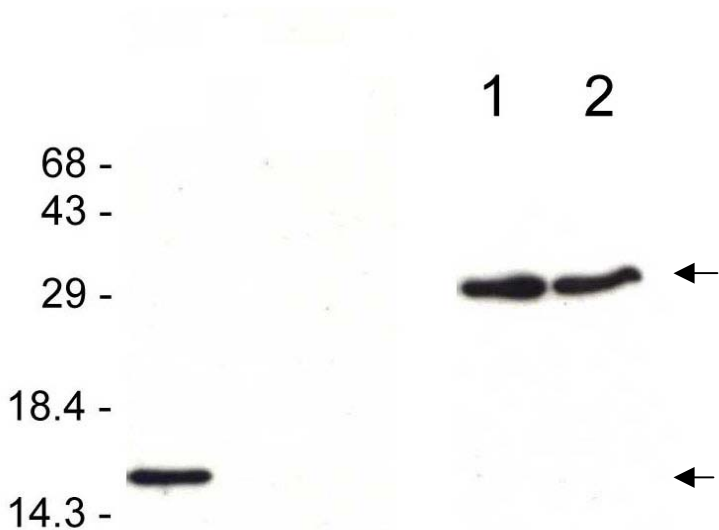

Supplement: 12943_2002_6_MOESM2_ESM.pdf [file 12943_2002_6_MOESM2_ESM.pdf]

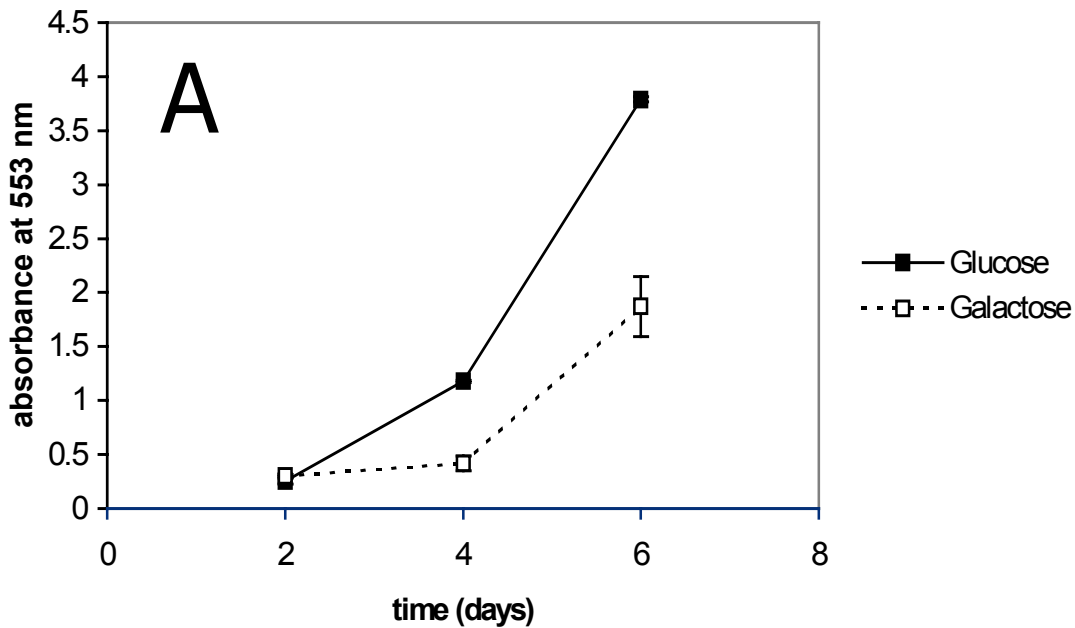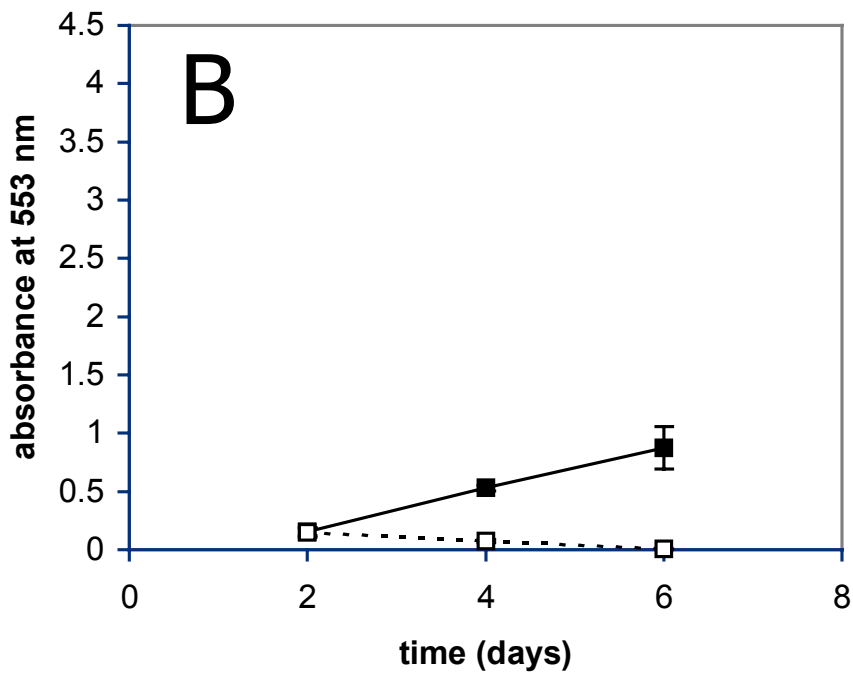

Supplement: 12943_2002_6_MOESM3_ESM.pdf [file 12943_2002_6_MOESM3_ESM.pdf]

nmol MDA equivalent/mg protein

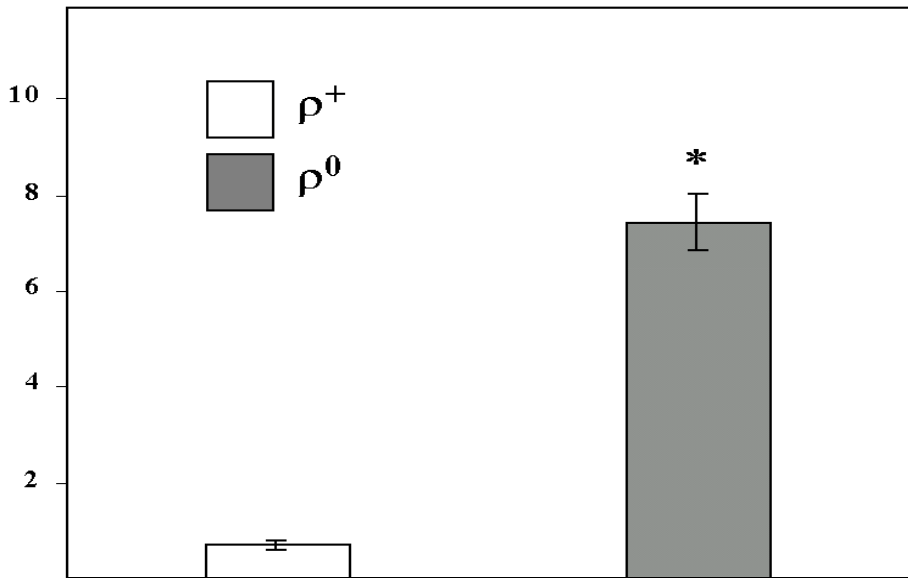

Supplement: 12943_2002_6_MOESM4_ESM.pdf [file 12943_2002_6_MOESM4_ESM.pdf]
